# Supplementary material for: Structural basis for the clamping and Ca2+ activation of SNARE-mediated fusion by synaptotagmin
Source: PubMed Central journal article supplement (PMC6546687; doi:10.1038/s41467-019-10391-x), 2019-06-03
Supplement: 41467_2019_10391_MOESM3_ESM.pdf [file 41467_2019_10391_MOESM3_ESM.pdf]

## Description of Additional Supplementary Files

File Name: Supplementary Movie 1

Description: Fitting of the separate C2A (magenta), C2B (grey) and SNARE (multi-color) derived from the Syt1-SNARE crystal structure (PDB code: 5CCI) onto the cryo-EM map shows that the Syt1 C2B domain concurrently binds both the SNARE proteins and the lipid membranes (yellow) on diametrically opposite surfaces under resting (1mM Mg<sup>2+</sup>-conditions).
